# Supplementary material
Source: Springer Nature journal article supplement (https://www.springermedizin.de/resource/supplementary/12888_2013_1665_MOESM1_ESM.pdf/9481080)
Supplement: MOESM1 [file 9481080]

Additional file 1: Table S1. Concordance of diagnoses assessed by expert opinion and by the MINI

Diagnoses assessed by the MINI

| Diagnoses assessed by expert opinion   | Diagnoses assessed by the MINI |          |          |    |          |          |    |          |          |          |          |          |          |
|----------------------------------------|--------------------------------|----------|----------|----|----------|----------|----|----------|----------|----------|----------|----------|----------|
|                                        | 1.                             | 2.       | 3.       | 4. | 5.       | 6.       | 7. | 8.       | 9.       | 10.      | 11.      | 12.      | 13.      |
| 1. Major depressive episode, current   | <u>2</u>                       | 3        | 1        |    |          |          |    |          |          |          |          |          | 1        |
| 2. Major depressive episode, recurrent | 4                              | <u>5</u> |          |    |          |          |    |          |          | 1        |          |          | 4        |
| 3. Dysthymia                           |                                |          | <u>1</u> |    |          |          |    |          |          |          |          |          |          |
| 4. Agoraphobia                         |                                |          |          |    |          |          |    |          |          |          |          |          |          |
| 5. Social phobias                      |                                |          |          |    | <u>4</u> |          |    |          |          |          |          |          |          |
| 6. Panic disorder                      |                                |          |          | 1  |          | <u>3</u> |    |          |          |          |          |          |          |
| 7. Generalised anxiety disorder        |                                |          |          | 1  |          | 1        |    |          |          |          |          |          |          |
| 8. Post-traumatic stress disorder      |                                |          |          |    |          |          | 1  | <u>1</u> |          |          |          |          |          |
| 9. Alcohol dependence and abuse        |                                |          |          |    |          |          |    |          | <u>2</u> |          |          |          |          |
| 10. Drug dependence and abuse          |                                |          |          |    |          |          |    |          |          | <u>1</u> |          |          |          |
| 11. Psychotic disorders                |                                |          |          |    |          |          |    |          |          |          | <u>1</u> |          |          |
| 12. Dissocial personality disorder     |                                |          |          |    |          |          |    |          |          |          |          | <u>1</u> |          |
| 13. No diagnosis                       |                                | 1        |          | 1  | 3        | 5        | 1  | 1        |          | 1        |          |          | <u>2</u> |
| 14. Other                              | 2                              |          | 2        |    |          | 1        |    | 1        | 1        | 1        |          | 1        | 14       |

The table includes only the diagnoses that were applied by the assessors. The vertical axis represents the diagnoses in the assessment by the expert opinion. The horizontal axis represents the diagnoses given in the MINI interview. The numbers in the cells show the frequency of each combination of diagnoses. Underlined numbers indicate full agreement.
